# Supplementary material for: Competing reactions of selected atmospheric gases on Fe3O4nanoparticles surfaces
Source: Royal Society of Chemistry journal article supplement (doi:10.1039/c4cp02379j), 2014-09-23
Supplement: c4cp02379j1.pdf [file c4cp02379j1.pdf]

## Competing reactions of selected atmospheric gases on Fe<sub>3</sub>O<sub>4</sub> nanoparticles surfaces

Nermin Eltouny<sup>a</sup> and Parisa A. Ariya<sup>a,b\*</sup>

<sup>a</sup>Department of Chemistry, McGill University

<sup>b</sup>Department of Atmospheric and Oceanic Sciences, McGill University, Montreal

801 Sherbrooke West, Montreal, QC, Canada H3A 2K6

\*Corresponding author email: [parisa.ariya@mcgill.ca](mailto:parisa.ariya@mcgill.ca)

### Supporting Information

#### X-ray diffraction (XRD)

Details on instrumental conditions for data collection acquired on a Siemens D5000 diffractometer with Cu K $\alpha$  radiation ( $\lambda = 1.5418 \text{ \AA}$ ) are presented in Table S1.

**Table S1.** XRD data acquisition parameters for Fe<sub>3</sub>O<sub>4</sub> NPs

| XRD parameters          | 2 $\theta$ (°) | $\Delta 2\theta$ (°) | $\Delta t$ (sec) |
|-------------------------|----------------|----------------------|------------------|
| S <sub>adsorption</sub> | 20-70          | 0.5                  | 10               |
| S <sub>reduced</sub>    | 10-70          | 0.5                  | 10               |
| S <sub>oxidized</sub>   | 10-70          | 0.1                  | 10               |

## Analyses by GC-MS and GC-FID of a typical flask consisting of toluene and NO<sub>2</sub>

The GC-MS spectra in Figure S1 show that the blanks for the flasks, with only dry air, contained peaks at retention times of 9.31 min ( $m/z = 73, 267, 268, 355, 356$ - cyclopentasiloxane) and 11.94 min ( $m/z = 73, 147, 251, 341, 429$ -cyclohexasiloxane) attributed to organosiloxanes. Organosiloxanes are due to the deactivating agent (Glassclad 18, UCT) used to coat the glassware. The organosiloxane peaks remained constant for the blank (dry air only), toluene and toluene + NO<sub>2</sub> flasks indicating that a reaction had not occurred with either the toluene or the NO<sub>2</sub>. The CAR/PDMS SPME fibre consists of a fused silica fibre coated with PDMS in which porous carbon particles are embedded rendering it suitable for the sampling of volatile organic compounds <sup>1</sup>. including aldehydes, ketones and carboxylic acids <sup>2</sup>. Organics were not detected in the blank flasks within the detection limits of the SPME (low ppbv) and GC-MS; therefore it is unlikely that organic residues were left on the walls of the flasks in quantities sufficient to impact the reaction.

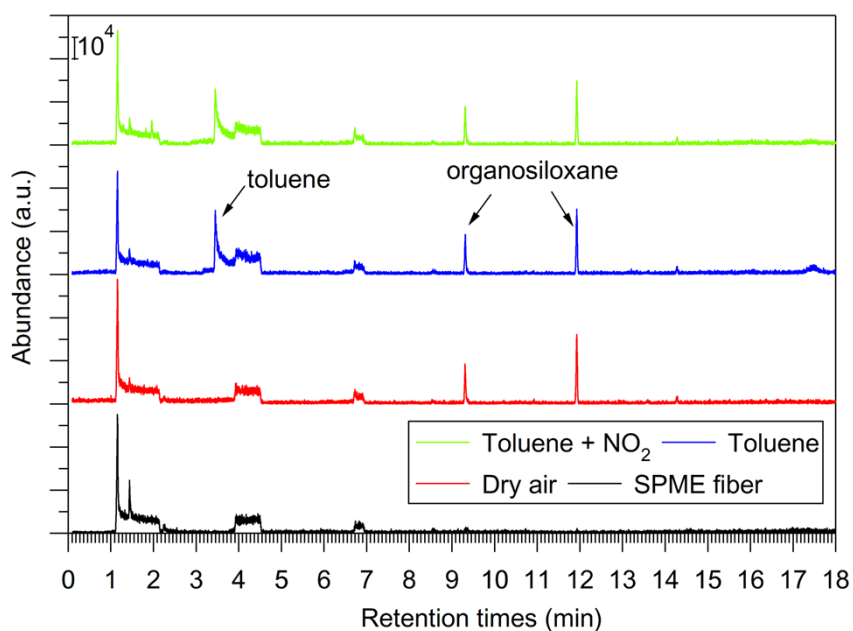

**Figure S1.** Overlay of blank SPME fibre, blank flask containing dry air, flask containing toluene and flask containing toluene + NO<sub>2</sub>.

## Data acquisition using gas chromatography and solid phase micro-extraction (spme)

The initial GC-FID oven temperature was 50 °C; then a ramp rate of 20 °C.min<sup>-1</sup> was applied and the temperature reached 110 °C, which was held for 2.2 minutes. Sampling was achieved using SPME with an extraction time of *c.a.*, 1 minute, which was injected in the GC port at 290 °C for 3 minutes. For the GC-MS data acquisition, the same temperature program was applied with the exception of the higher final temperature, which was set at 220 °C.

## XPS spectra curve fitting and peak assignments

The Advantage Software (Thermo scientific) was used to deconvolute the high resolution spectra for Fe2p, C1s, and O1s core lines. Shirley and SMART backgrounds were subtracted from the C1s and O1s, and from the Fe2p, respectively. All spectra were charge corrected relative to adventitious carbon at 285.0 eV.<sup>3</sup> Peaks below 285.0 eV account for differential charging across the sample. The C1s spectra for  $S_{\text{reduced}}$  and  $S_{\text{oxidized}}$  are shown in Figure S1 and S2, respectively.

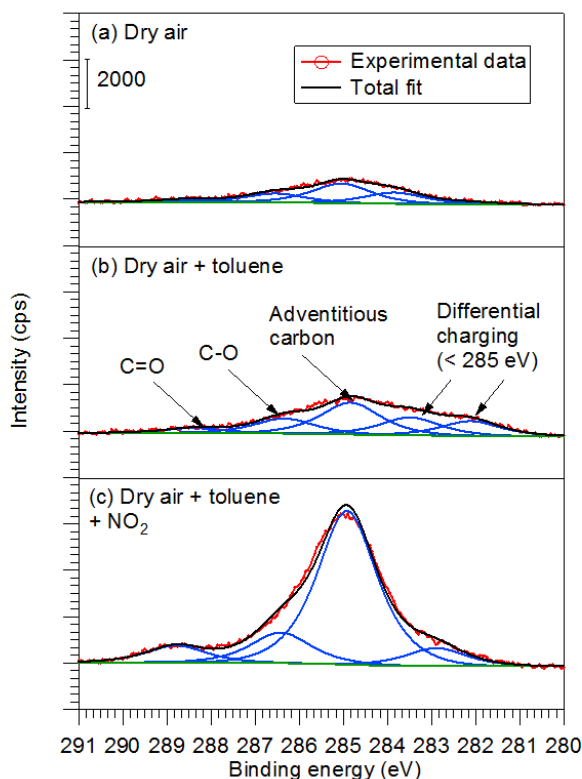

**Figure S2.** XPS C1s spectra for  $S_{\text{reduced}}$ .

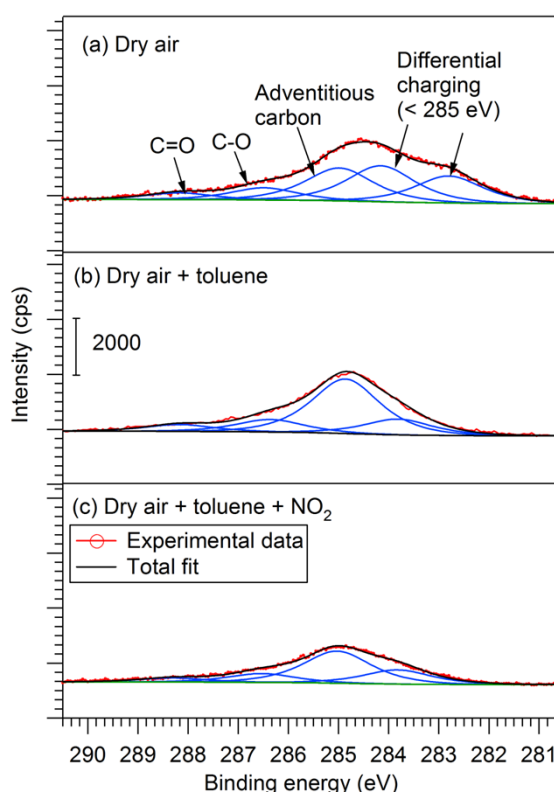

**Figure S3.** XPS C1s spectra for  $S_{\text{oxidized}}$ .

The Fe2p<sub>3/2</sub> spectra were deconvoluted into 5 peaks corresponding to one peak for Fe<sup>2+</sup> (octahedral), and two peaks for Fe<sup>3+</sup> (octahedral and tetrahedral), and two satellite peaks for Fe<sup>2+</sup> and Fe<sup>3+</sup> fixed at + 5.9 and 8.0 eV, respectively, which compare well with the reported value of 6.0 eV<sup>4</sup> and 8.0 eV.<sup>4</sup> To validate the fitted peaks, the atomic percent contributions of carbon-oxygen contributions in the C1s spectra were compared with those observed in the organic oxygen-carbon components of the O1s spectra, while the Fe<sup>2+</sup> and Fe<sup>3+</sup> contributions in the Fe2p<sub>3/2</sub> spectra were compared with those assigned to O-Fe and HO-Fe components of the O1s spectra. An example of element corroboration is given in Table S2. The full width half maxima for the fitted peaks of C1s, O1s, and Fe2p were fixed at 1.6 eV, 1.8 eV, and 3.4 eV, respectively, and are based on values determined in a previous study carried

out on the same instrument.<sup>5</sup> The L:G mixing ratios for curve fitted peaks were fixed at 40. For the purpose of clarity in the figures 5 and 7, the corresponding Fe2p<sub>1/2</sub> doublet for each fitted peak of the Fe2p<sub>3/2</sub>, arising from spin-orbit splitting and appearing above 718.7 eV are not labelled. Atomic percent contributions are calculated from the fitted peaks of Fe2p<sub>3/2</sub> due to the larger intensity (Fe2p<sub>3/2</sub>:Fe2p<sub>1/2</sub> is 2:1).

**Table S2.** XPS peak fittings for C1s, O1s, and Fe2p<sub>3/2</sub> spectra for S<sub>oxidized</sub> fraction (c) toluene + NO<sub>2</sub>

| Element Peak Deconvolution                       | Binding Energy (eV) | FWHM (eV) | Atomic % |
|--------------------------------------------------|---------------------|-----------|----------|
| Carbon: C1s                                      |                     |           |          |
| Differential charging                            | 283.8               | 1.6       | 4.2      |
| C-C                                              | 285.0               | 1.6       | 9.5      |
| C-O                                              | 286.5               | 1.6       | 2.6      |
| C=O                                              | 288.3               | 1.6       | 1.21     |
| Carbon-Oxygen contributions: 2.6+1.2 = 3.8 %     |                     |           |          |
| Oxygen: O1s                                      |                     |           |          |
| Nonequivalent oxygen                             | 528.1               | 1.8       | 0.6      |
| O-Fe                                             | 529.9               | 1.8       | 35.7     |
| HO-Fe                                            | 531.4               | 1.8       | 8.9      |
| O-C                                              | 533.3               | 1.8       | 2.9      |
| Oxygen-Carbon contributions: 2.9 %               |                     |           |          |
| Oxygen-Iron contribution = 35.7 + 8.9 = 44.6%    |                     |           |          |
| Iron: Fe2p <sub>3/2</sub>                        |                     |           |          |
| Fe <sup>2+</sup> (oct)                           | 710.06              | 3.4       | 8.5      |
| Fe <sup>3+</sup> (oct)                           | 710.66              | 3.4       | 10.0     |
| Fe <sup>3+</sup> (thd)                           | 713.46              | 3.4       | 5.9      |
| Fe <sup>2+</sup> Satellite                       | 716.06              | 5.3       | 1.7      |
| Fe <sup>3+</sup> Satellite                       | 718.7               | 5.3       | 8.0      |
| Iron-Oxygen contributions:                       |                     |           |          |
| Fe-O = 8.5+1.7 = 10.2                            |                     |           |          |
| Fe <sub>2</sub> O <sub>3</sub> = 10+5.9+8 = 24   |                     |           |          |
| Fe-O total contribution = 10.2 + 24*1.5 = 46.2 % |                     |           |          |

#### Error calculation on ratios obtained from XPS and TOF SIMS

The error on the ratios from XPS were determined using the corrected area under each peak assigned to species  $i$  and  $j$ ,  $A_i$  and  $A_j$ , calculated by the Avantage<sup>TM</sup> software<sup>6</sup> and given by equation S1:

$$A_i = \frac{I_i}{T(E_i)R_iE_i^n} \quad (S1)$$

Where  $I_i$  is the intensity for species  $i$ , the kinetic energy,  $E_i$ , instrument transmission function,  $T(E_i)$ , relative sensitivity factor,  $R_i$  and escape depth component,  $n$ . The error,  $\sigma R$ , is calculated using the method of propagation of errors<sup>7</sup> using equation S2, :

$$\sigma R = R \sqrt{\left(\frac{\sigma A_i}{A_i}\right)^2 + \left(\frac{\sigma A_j}{A_j}\right)^2} \quad (S2)$$

where  $\sigma A_{i,j}$  is the square root of  $A_{i,j}$ . The errors on the ratios from TOF SIMS were calculated using the equation S2 and by replacing the area with ion intensity.

### Examples of other adsorption experiments

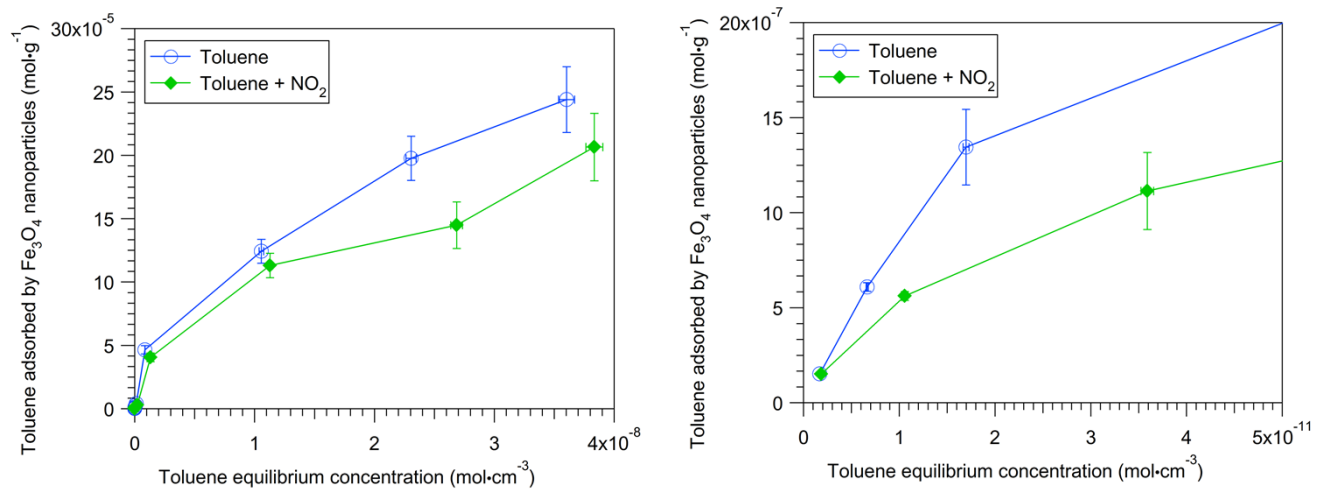

**Figure S4.** Experimental adsorption isotherms of toluene on Fe<sub>3</sub>O<sub>4</sub> NPs in dry air alone and in the presence of NO<sub>2</sub> at the low (left graph) and high (right) concentration range.

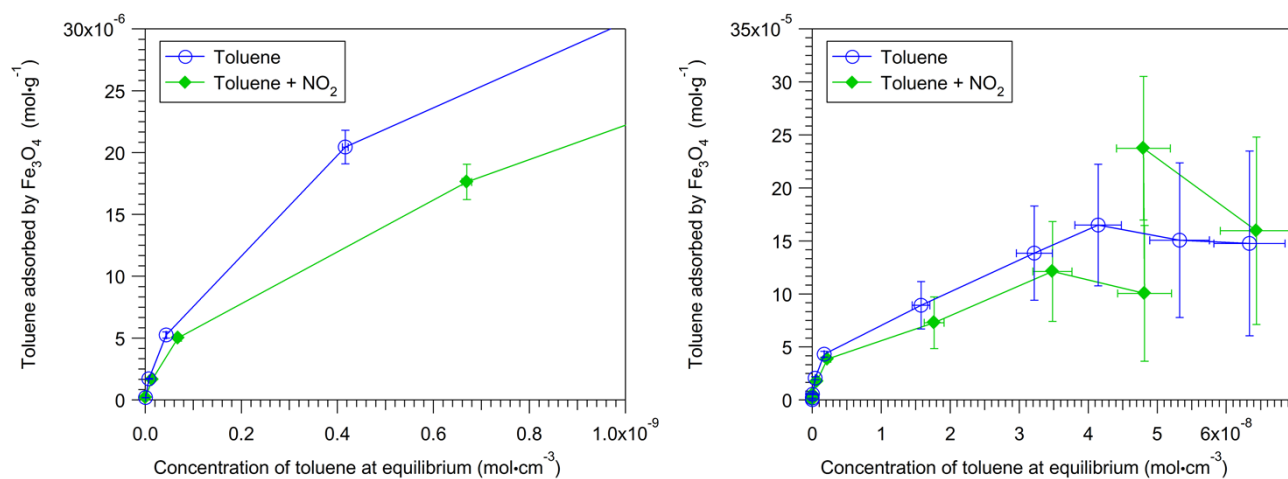

**Figure S5.** Experimental adsorption isotherms of toluene on  $\text{Fe}_3\text{O}_4$  NPs NPs in dry air alone and in the presence of  $\text{NO}_2$  at the low (left graph) and high (right) concentration range. Error bars represent standard errors calculated by the propagation of error during preparation and analyses.

**Table S3.** Adsorption models and their respective assumptions

| Model                                                                  | Equation                                                                                                                                | Parameter description                                                                                                                                                                                       | Applicability/Assumptions                                                                                                                                                                   |
|------------------------------------------------------------------------|-----------------------------------------------------------------------------------------------------------------------------------------|-------------------------------------------------------------------------------------------------------------------------------------------------------------------------------------------------------------|---------------------------------------------------------------------------------------------------------------------------------------------------------------------------------------------|
| <b>Langmuir</b> <sup>8</sup>                                           | $n_{ads} = q_m \frac{bC_{eq}}{1 + bC_{eq}}, b = \frac{s_0 e^{\frac{q_{st}}{kT}}}{\nu \sigma \sqrt{2\pi m k T}}$                         | q <sub>m</sub> : monolayer adsorption capacity,<br>s <sub>0</sub> : initial sticking probability<br>q <sub>st</sub> : isosteric heat of adsorption<br>σ: density of adsorption sites<br>ν: frequency factor | Homogeneous energy sites <sup>9</sup><br>No lateral interaction                                                                                                                             |
| <b>Freundlich</b> <sup>10</sup>                                        | $n_{ads} = K_F C_{eq}^{\frac{1}{n}}$                                                                                                    | K <sub>F</sub> : Freundlich constant<br>n: heterogeneity parameter                                                                                                                                          | Heterogeneity of energy sites<br>No lateral interactions                                                                                                                                    |
| <b>Toth</b> <sup>11</sup>                                              | $n_{ads} = q_m \frac{QtC_{eq}}{(Kt + C_{eq}^t)^{1/t}}$                                                                                  | Qt and Kt: Toth constants<br>t: heterogeneity parameter <sup>12</sup> (0-1)                                                                                                                                 | Heterogeneity of sites, <sup>9</sup> lateral interactions<br>Reduces to Langmuir <sup>13</sup> for t=1                                                                                      |
| <b>Redlich- Peterson (RP)</b> <sup>14</sup>                            | $n_{ads} = \frac{K_r C_{eq}}{(1 + A_r C_{eq}^g)}$                                                                                       | K <sub>r</sub> and A <sub>r</sub> : RP constants<br>b: 0-1                                                                                                                                                  | Homogeneous and heterogeneous<br>Reduces to Freundlich at high C <sub>eq</sub> <sup>15</sup>                                                                                                |
| <b>Sips</b>                                                            | $n_{ads} = \frac{K_s A_s C_{eq}^S}{(1 + A_s C_{eq}^S)}$                                                                                 | K <sub>s</sub> : max ads cap<br>A <sub>s</sub> : Sips constant<br>s: isotherm exponent (-1-+1)                                                                                                              | Heterogeneous energy sites, <sup>16</sup> no lateral interaction<br>Reduces to Langmuir at high C <sub>eq</sub> <sup>17</sup><br>Reduces to Freundlich at low C <sub>eq</sub> <sup>18</sup> |
| <b>Langmuir Dissociative adsorption (LD)</b> <sup>19</sup>             | $n_{ads} = q_m \frac{\sqrt{b_2 C_{eq}}}{1 + \sqrt{b_2 C_{eq}}}, b_2 = \frac{s_0 e^{\frac{q_{st}}{kT}}}{\nu \sigma^2 \sqrt{2\pi m k T}}$ |                                                                                                                                                                                                             | Recombinative 2 <sup>nd</sup> desorption<br>Energetically heterogeneous sites present in equal concentration <sup>19</sup>                                                                  |
| <b>Langmuir Dissociative adsorption (LDQ)</b> <sup>19</sup>            | $n_{ads} = q_m \frac{1 + 2bC_{eq} - \sqrt{1 + 4bC_{eq}}}{2bC_{eq}}$                                                                     |                                                                                                                                                                                                             | Quasi 1 <sup>st</sup> order desorption-dissociated species are immobile                                                                                                                     |
| <b>Langmuir Dissociative and mobile adsorption (LDM)</b> <sup>19</sup> | $q = q_m \frac{1 + bC_{eq} - \sqrt{[1 - bC_{eq}]^2 + 4KbC_{eq}}}{2(1 - K)}$                                                             | p <sub>d</sub> <sup>'</sup> : desorption probability at occupied site<br>p <sub>d</sub> : desorption probability at unoccupied site                                                                         | Mobile adsorption                                                                                                                                                                           |

$$K = \frac{p_d}{p_a + p_d}$$

$p_a$ : adsorption probability

**Table S4.** Fitting parameters for adsorption models of the adsorption of toluene on Fe<sub>3</sub>O<sub>4</sub> NPs with and without NO<sub>2</sub> in air.

| Isotherm model                 | RP                  |                      |                      | LD                     |                        | LDQ                    |                        | LDM                    |                        |                      |
|--------------------------------|---------------------|----------------------|----------------------|------------------------|------------------------|------------------------|------------------------|------------------------|------------------------|----------------------|
| <i>Toluene</i>                 |                     |                      |                      |                        |                        |                        |                        |                        |                        |                      |
|                                | $K_r (\times 10^5)$ | $A_r$                | $g (\times 10^{-1})$ | $b$                    | $Q_m (\times 10^{-1})$ | $b (\times 10^8)$      | $Q_m (\times 10^{-4})$ | $b (\times 10^6)$      | $Q_m (\times 10^{-2})$ | $K (\times 10^3)$    |
| Values                         | 8.6                 | 1.2×10 <sup>5</sup>  | 4.6                  | 732                    | 1.05                   | 1.45                   | 7.7                    | 2.38                   | 8.0                    | 5.65                 |
| ERR <sub>SD</sub>              | 3.0                 | 2.9×10 <sup>4</sup>  | 0.21                 | 0                      | 0.082                  | 0.178                  | 0                      | 0                      | 0                      | 0.235                |
| Adj. R <sup>2</sup>            | 0.998               |                      |                      | 0.947                  |                        | 0.975                  |                        | 0.997                  |                        |                      |
| <i>Toluene, NO<sub>2</sub></i> |                     |                      |                      |                        |                        |                        |                        |                        |                        |                      |
|                                | $K_r (\times 10^4)$ | $A_r (\times 10^3)$  | $g$                  | $b$                    | $Q_m (\times 10^{-2})$ | $b (\times 10^5)$      | $Q_m (\times 10^{-2})$ | $b (\times 10^8)$      | $Q_m (\times 10^{-4})$ | $K (\times 10^{-1})$ |
| Value                          | 4.2                 | 1.6                  | 0.45                 | 427                    | 7.10                   | 4.20                   | 2.00                   | 1.22                   | 1.0                    | 4.76                 |
| Isotherm model                 | Freundlich          |                      | Langmuir             |                        | Toth                   |                        | Sips                   |                        |                        |                      |
| ERR <sub>SD</sub>              | 1.5                 | 2.4                  | 0                    | 0                      | 1.51                   | 0.00                   | 0                      | 0                      | 0                      | 5.2                  |
| Adj. R <sup>2</sup>            | 0.977               |                      |                      | 0.764                  |                        | 0.996                  |                        | 0.899                  |                        |                      |
|                                | $K_F$               | $n (\times 10^{-2})$ | $b (\times 10^8)$    | $Q_m (\times 10^{-4})$ | $Q_t$                  | $K_t$                  | $t (\times 10^{-2})$   | $K_s (\times 10^{-3})$ | $A_s (\times 10^4)$    | $S (\times 10^{-2})$ |
| Values                         | 20.1                | 166                  | 1.83                 | 5.39                   | 0.918                  | 0.194                  | 9.92                   | 1.86                   | 3.37                   | 65.2                 |
| ERR <sub>SD</sub>              | 4.57                | 3.28                 | 0.619                | 0.738                  | 2.68                   | 0.130                  | 3.20                   | 0.550                  | 2.49                   | 2.21                 |
| Adj. R <sup>2</sup>            | 0.996               |                      | 0.963                |                        | 0.998                  |                        | 0.998                  |                        |                        |                      |
| <i>Toluene, NO<sub>2</sub></i> |                     |                      |                      |                        |                        |                        |                        |                        |                        |                      |
|                                | $K_F (\times 10^2)$ | $n (\times 10^{-2})$ | $b (\times 10^7)$    | $Q_m (\times 10^{-3})$ | $Q_t (\times 10^{-3})$ | $K_t (\times 10^{-5})$ | $t$                    | $K_s$                  | $A_s$                  | $S (\times 10^{-2})$ |
| Value                          | 3.75                | 127                  | 1.29                 | 1.63                   | 2.50                   | 1.12                   | 0.718                  | 1.43                   | 2.65 × 10 <sup>2</sup> | 78.8                 |
| ERR <sub>SD</sub>              | 2.23                | 5.15                 | 1.16                 | 1.19                   | 1.80                   | 0.740                  | 0                      | 1.37 × 10 <sup>3</sup> | 2.54 × 10 <sup>5</sup> | 8.18                 |
| Adj. R <sup>2</sup>            | 0.987               |                      | 0.965                |                        | 0.969                  |                        | 0.986                  |                        |                        |                      |

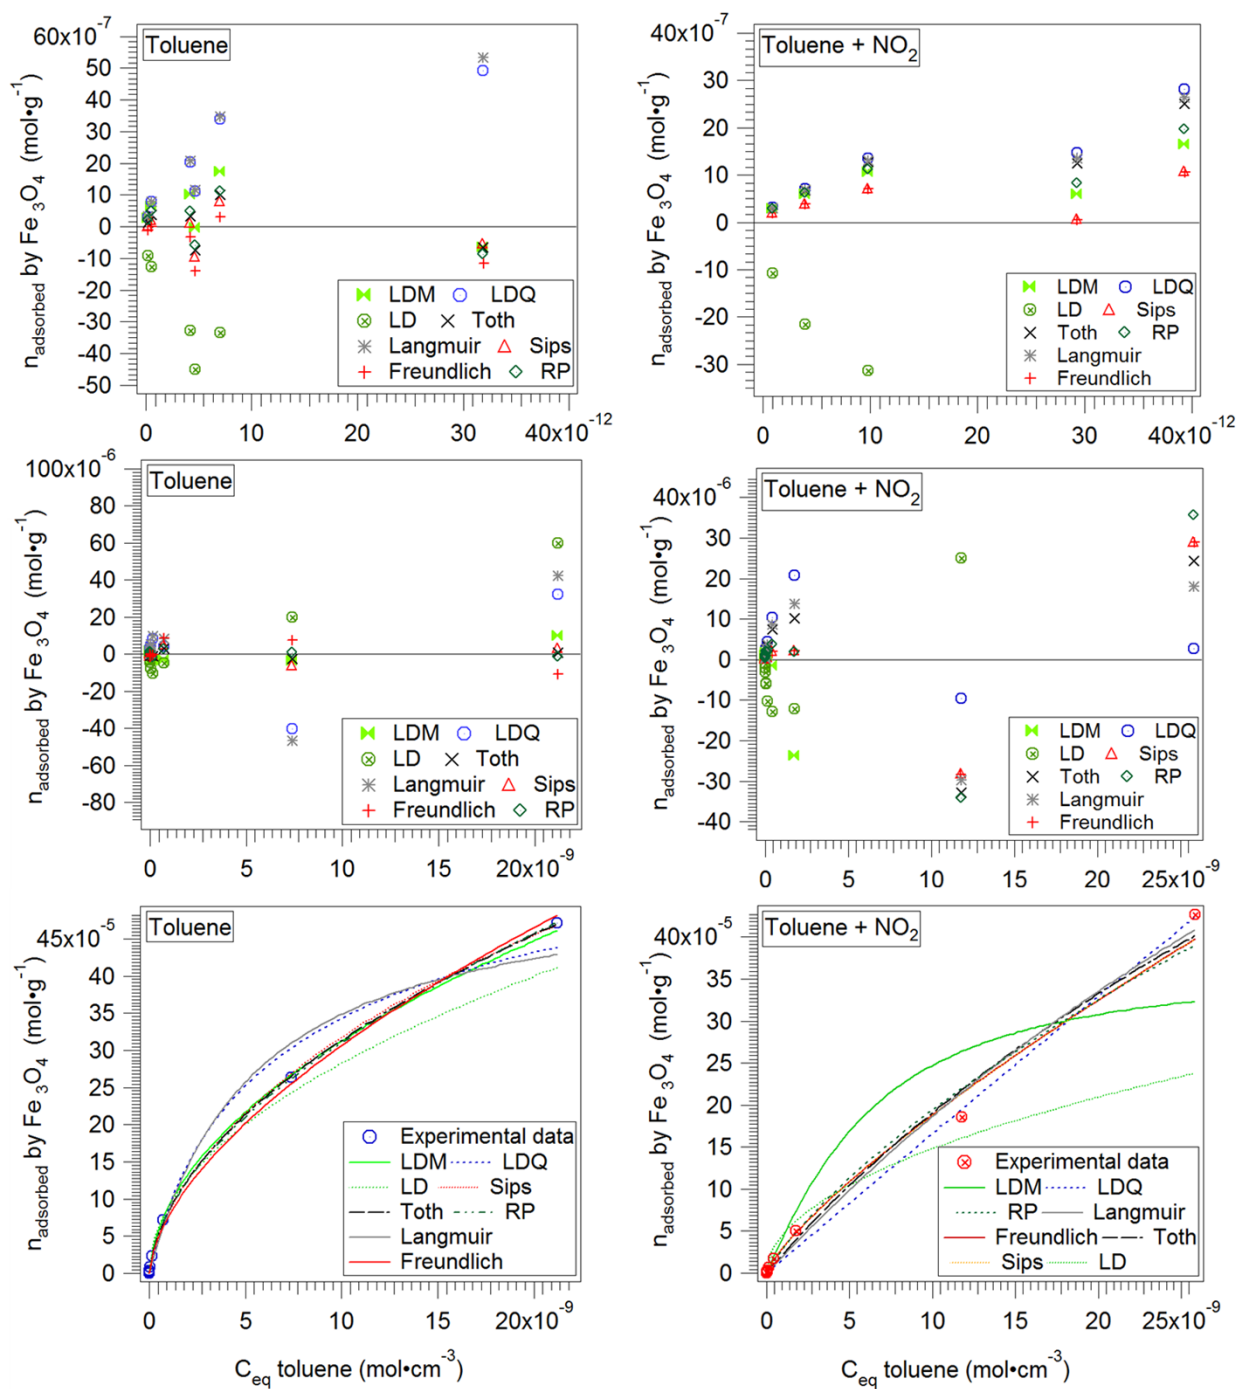

**Figure S6.** Comparison of isotherms (bottom) fitted using different models and respective residuals over low (top) and high (middle) concentration range for the adsorption of toluene on  $\text{Fe}_3\text{O}_4$  NPs with (right) and without  $\text{NO}_2$  (left) in air.

### Details on the calculations used in the Akaike criterion test for the comparison of adsorption models

The small-sample corrected AIC values for each model are calculated according to equation 1 and the relative likelihood of the model with lower AIC value is calculated using equation 2 (OriginPro 8® <sup>20</sup>)

$$AIC = N \ln \left( \frac{RSS}{N} \right) + 2K + \frac{2K(K+1)}{N-K-1}, \text{ where } \frac{N}{K} < 40 \quad (1)$$

$$\text{Relative likelihood} = \exp \left( -\frac{1}{2} \Delta i \right), \text{ where } \Delta i = \text{abs}(AIC(RP)) - \text{abs}(AIC(F)) \quad (2)$$

## TOF SIMS spectra

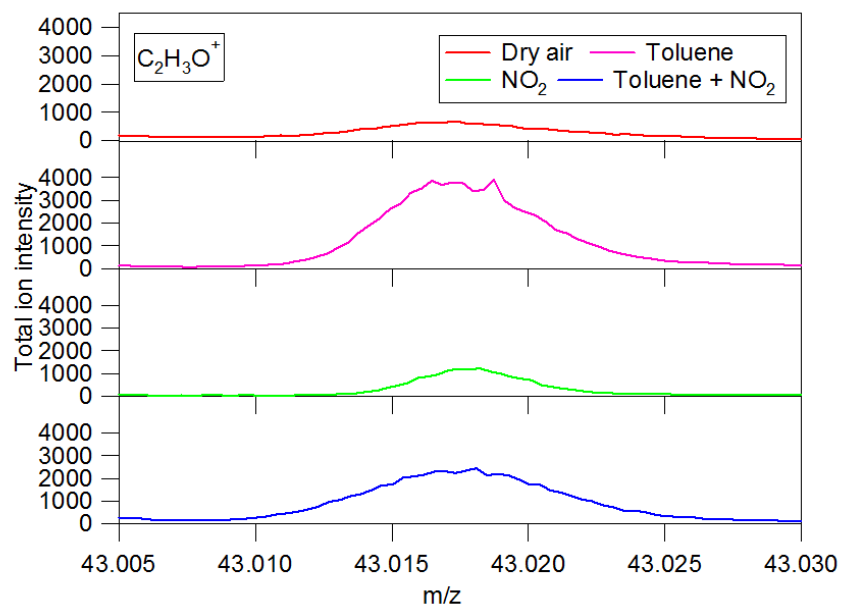

**Figure S7.** Positive mode TOF SIMS  $m/z$  43 total ion intensities for fractions of  $\text{Fe}_3\text{O}_4$  NPs batch  $S_{\text{oxidized}}$

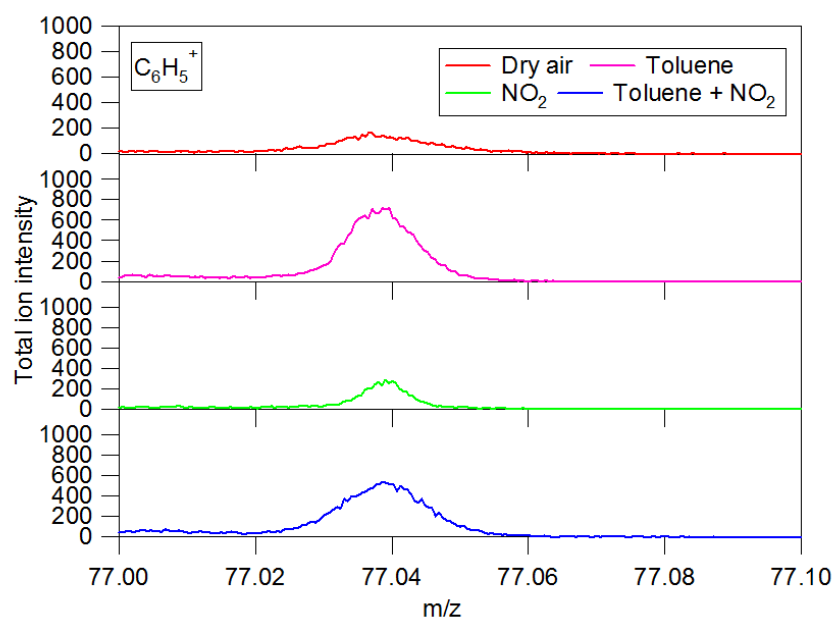

**Figure S8.** Positive mode TOF SIMS  $m/z$  77 total ion intensities for fractions of  $\text{Fe}_3\text{O}_4$  NPs batch  $S_{\text{oxidized}}$

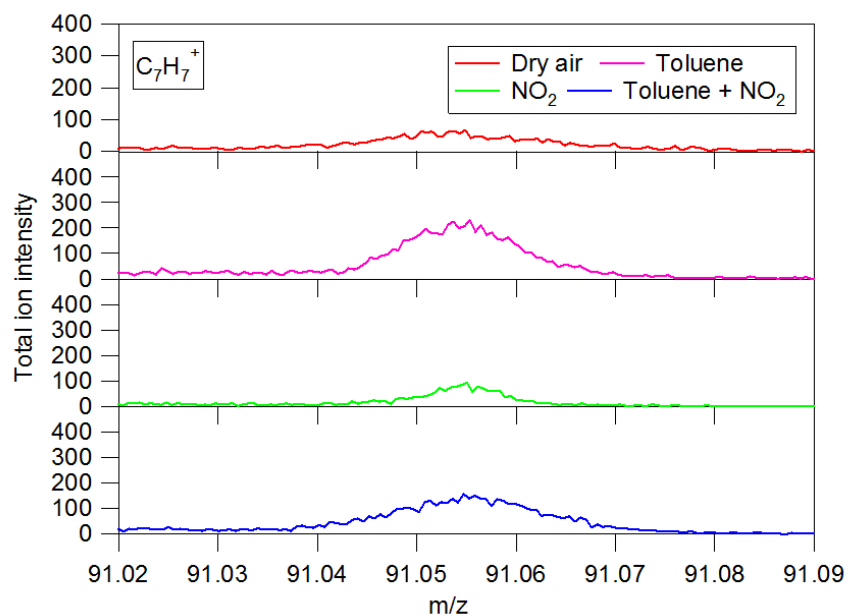

**Figure S9.** Positive mode TOF SIMS  $m/z$  91 total ion intensities for fractions of  $Fe_3O_4$  NPs batch  $S_{oxidized}$

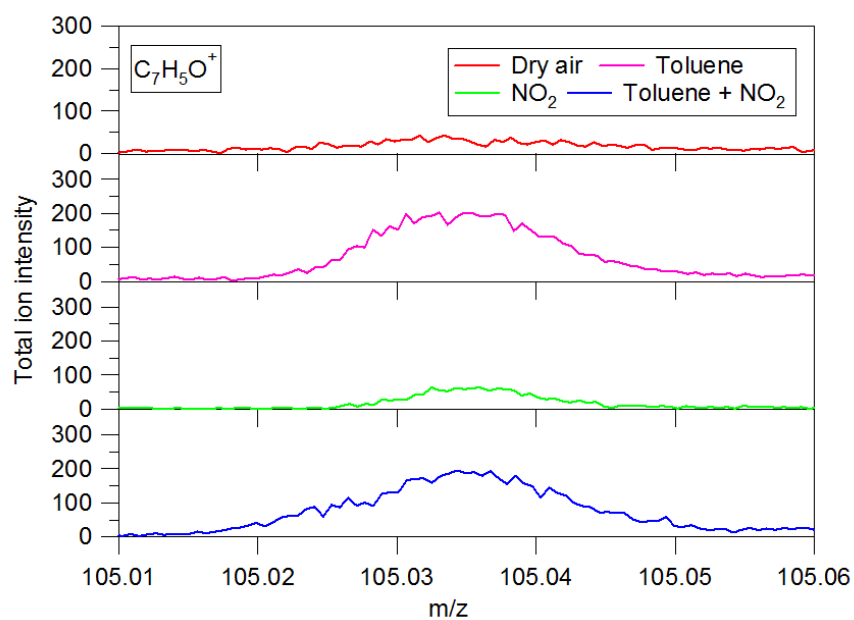

**Figure S10.** Positive mode TOF SIMS  $m/z$  105 total ion intensities for fractions of  $Fe_3O_4$  NPs batch  $S_{oxidized}$ .

**Table S5.** Assignments of binding energies (in eV) and ratios calculated from high resolution fitted spectra of Fe2p and O1s XPS for Fe<sub>3</sub>O<sub>4</sub> NPs exposed to 0.65 ppmv of NO<sub>2</sub> alone in dry air.

| Assigned Species, Reported literature BE                                                                                                                            | S <sub>oxidized</sub><br>NO <sub>2</sub> |
|---------------------------------------------------------------------------------------------------------------------------------------------------------------------|------------------------------------------|
| OH (nonequivalent):-1.6, O <sup>2-</sup> (undercoordinated):-1 (rel. Fe-O) <sup>21</sup>                                                                            | 527.6                                    |
| O-Fe: 529.9 ± 0.4 <sup>5</sup> , 530.1 ± 0.2 <sup>4</sup>                                                                                                           | 530.1                                    |
| HO-Fe, Adsorbed O, O=C: 531.4 ± 0.2 <sup>4</sup> , 531.6 <sup>22</sup> , 531.3 531.9-532.8 <sup>23</sup>                                                            | 531.6                                    |
| NO <sub>3</sub> /NO <sub>2</sub> (on TiO <sub>2</sub> ):532.5/533 <sup>24</sup>                                                                                     |                                          |
| O-C: 532.4-533.5 <sup>23</sup>                                                                                                                                      |                                          |
| H <sub>2</sub> O on Fe <sub>3</sub> O <sub>4</sub> : 532.7 ± 0.1 γ-Fe <sub>2</sub> O <sub>3</sub> : 533.3 ± 0.1 <sup>25</sup> , H <sub>2</sub> O: 534 <sup>21</sup> | 533.2                                    |
| Fe <sup>2+</sup> /Fe <sup>3+</sup>                                                                                                                                  | 0.31 ± 2.2<br>× 10 <sup>-2</sup>         |
| Fe/O                                                                                                                                                                | 0.60 ± 2.2<br>× 10 <sup>-2</sup>         |
| O > 531.2 eV /O (total)                                                                                                                                             | 0.12 ± 8.3<br>× 10 <sup>-3</sup>         |
| O > 531.2 eV /Fe-O (non equiv., FeOH and FeO)                                                                                                                       | 0.13 ± 8.8<br>× 10 <sup>-3</sup>         |
| FeOH (including peak at 528 eV)/ FeO                                                                                                                                | 0.35 ± 2.0<br>× 10 <sup>-2</sup>         |

### Gas phase qualitative and quantitative analyses by GC-MS and GC-FID for flasks containing toluene and NO<sub>2</sub> only

To ensure that gas phase reactions between toluene and NO<sub>2</sub> did not occur, the gas phase was analyzed with GC-MS and GC-FID for the two systems (toluene and toluene + NO<sub>2</sub>). The GC-MS chromatograms in Figure S1 show that new peaks do not form when NO<sub>2</sub> is added to the system. We quantified the toluene concentration using the GC-FID detection system because it is more accurate than the GC-MS (run in Scan mode). In the absence of NPs, the peak area of toluene detected should be proportional to the concentration of toluene (amount of toluene injected in the flask). The difference between the concentrations of toluene alone and in the presence of NO<sub>2</sub> is within the allowable error of uncertainty (10 %). The linear fits show that the slopes for both systems are within the 10% uncertainty. These results indicate that toluene does not react with NO<sub>2</sub> in the gas phase under our experimental conditions, outside the margin of instrumental uncertainties. If a reaction had occurred in a significant manner, a decrease in the concentration of toluene would have been expected and new peaks detected, which is not the case.

### A note on experimental uncertainties on Fe<sup>2+</sup>/Fe<sup>3+</sup> ratios in XPS studies

XPS experiments for the adsorption of toluene to magnetite NPs of in dry air show a change in the Fe<sup>2+</sup>/Fe<sup>3+</sup> ratio that is within experimental uncertainties, i.e., ± 0.02. We have systematically observed<sup>26</sup> an increase in the Fe<sup>2+</sup>/ Fe<sup>3+</sup> for this specific system constituted of toluene, dry air and Fe<sub>3</sub>O<sub>4</sub> NPs <sup>+</sup>. The sample S<sub>oxidized</sub> exposed to 100 ppmv of toluene only in dry air reveals the same increasing trend in the Fe<sup>2+</sup>/Fe<sup>3+</sup>. Therefore, this increase is likely real albeit small when compared to samples tested in our

previous study shown in the figure below. It is possible that the change is not as high as what was observed for other samples due to the higher initial oxidation level of  $S_{\text{reduced}}$ , which is closest to the stoichiometric ratio value of 0.50 for  $\text{Fe}_3\text{O}_4$ .

## References

- (1) Mani, V. In *Applications of Solid Phase Microextraction*; Pawliszyn, J., Ed.; The Royal Society of Chemistry: 1999, p 57.
- (2) Natera Marin, R.; Castro Mejías, R.; de Valme García Moreno, M.; García Rowe, F.; García Barroso, C. *Journal of Chromatography A* **2002**, 967, 261.
- (3) Briggs, D. *Handbook of x-ray and ultraviolet photoelectron spectroscopy*; Heyden: London; Philadelphia, 1977.
- (4) Mills, P.; Sullivan, J. L. *J. Phys. D: Appl. Phys.* **1983**, 16, 723.
- (5) Poulin, S.; França, R.; Moreau-Bélanger, L.; Sacher, E. *J. Phys. Chem. C* **2010**, 114, 10711.
- (6) Thermo Fischer Scientific Inc.; Thermo Fischer Scientific Inc: 2013.
- (7) Taylor, J. R. *An introduction to error analysis : the study of uncertainties in physical measurements*; University Science Books: Mill Valley, Calif., 1982.
- (8) Langmuir, I. *J. Amer. Chem. Soc.* **1918**, 40, 1361.
- (9) Dąbrowski, A. *Adv. Colloid Interface Sci.* **2001**, 93, 135.
- (10) Freundlich, H. *Trans. Faraday Soc.* **1932**, 28, 195.
- (11) Rudzinski, W.; Everett, D. H. *Adsorption of gases on heterogeneous surfaces*; Access Online via Elsevier, 1991.
- (12) Tóth, J. *Adv. Colloid Interface Sci.* **1995**, 55, 1.
- (13) Kim, J.-H.; Lee, S.-J.; Kim, M.-B.; Lee, J.-J.; Lee, C.-H. *Industrial & Engineering Chemistry Research* **2007**, 46, 4584.
- (14) Redlich, O.; Peterson, D. L. *J. Phys. Chem.* **1959**, 63, 1024.
- (15) Jossens, L.; Prausnitz, J. M.; Fritz, W.; Schlünder, E. U.; Myers, A. L. *Chem. Eng. Sci.* **1978**, 33, 1097.
- (16) Jaroniec, M. *Surf. Sci.* **1975**, 50, 553.
- (17) Foo, K. Y.; Hameed, B. H. *Chem. Eng. J.* **2010**, 156, 2.
- (18) Sips, R. *J. Chem. Phys.* **1950**, 18, 1024.
- (19) Ranke, W.; Joseph, Y. *Phys. Chem. Chem. Phys.* **2002**, 4, 2483.
- (20) OriginLab Corporation.
- (21) Kendelewicz, T.; Kaya, S.; Newberg, J. T.; Bluhm, H.; Mulakaluri, N.; Moritz, W.; Scheffler, M.; Nilsson, A.; Pentcheva, R.; Brown, G. E. *J. Phys. Chem. C* **2013**, 117, 2719.
- (22) Grosvenor, A. P.; Kobe, B. A.; McIntyre, N. S. *Surf. Sci.* **2004**, 565, 151.
- (23) Beamson, G. B. D. *High resolution XPS of organic polymers : the Scienta ESCA300 database*; Wiley: Chichester [England]; New York, 1992.
- (24) Haubrich, J.; Quiller, R. G.; Benz, L.; Liu, Z.; Friend, C. M. *Langmuir* **2010**, 26, 2445.
- (25) Biesinger, M. C.; Payne, B. P.; Grosvenor, A. P.; Lau, L. W. M.; Gerson, A. R.; Smart, R. S. C. *Appl. Surf. Sci.* **2011**, 257, 2717.
- (26) Eltoumy, N. A.; Ariya, P. A. *Ind. Eng. Chem. Res.* **2012**, 51, 12787.
